# Supplementary material for: High-responsivity graphene photodetectors integrated on silicon microring resonators
Source: PubMed Central journal article supplement (PMC8213857; doi:10.1038/s41467-021-23436-x), 2021-06-18
Supplement: 41467_2021_23436_MOESM1_ESM.pdf [file 41467_2021_23436_MOESM1_ESM.pdf]

Supplementary Information for:  
High-responsivity graphene photodetectors  
integrated on silicon microring resonators

S. Schuler<sup>1,2\*</sup>, J. E. Muench<sup>2\*</sup>, A. Ruocco<sup>2</sup>, O. Balci<sup>2</sup>,  
D. van Thourhout<sup>3</sup>, V. Sorianello<sup>4</sup>, M. Romagnoli<sup>4</sup>, K. Watanabe<sup>5</sup>,  
T. Taniguchi<sup>5</sup>, I. Goykhman<sup>2,6</sup>, A. C. Ferrari<sup>2†</sup>, Thomas Mueller<sup>1†</sup>

<sup>1</sup> Vienna University of Technology, Institute of Photonics, Gusshausstrasse  
27-29, 1040 Vienna, Austria

<sup>2</sup> Cambridge Graphene Centre, University of Cambridge, Cambridge CB3  
0FA, UK

<sup>3</sup> Ghent University-IMEC, Photonics Research Group, Technologiepark-Zwijnaarde  
126, 9052 Gent, Belgium

<sup>4</sup> Consorzio Nazionale per le Telecomunicazioni and Inphotec, via Moruzzi  
1, 56124 Pisa, Italy

<sup>5</sup> National Institute for Materials Science, 1-1 Namiki, Tsukuba, 305-0044  
Japan

<sup>6</sup> Technion - Israel Institute of Technology, Haifa, 3200003, Israel

\* These authors contributed equally

† email:acf26@eng.cam.ac.uk

† email:thomas.mueller@tuwien.ac.at

## Supplementary Figures

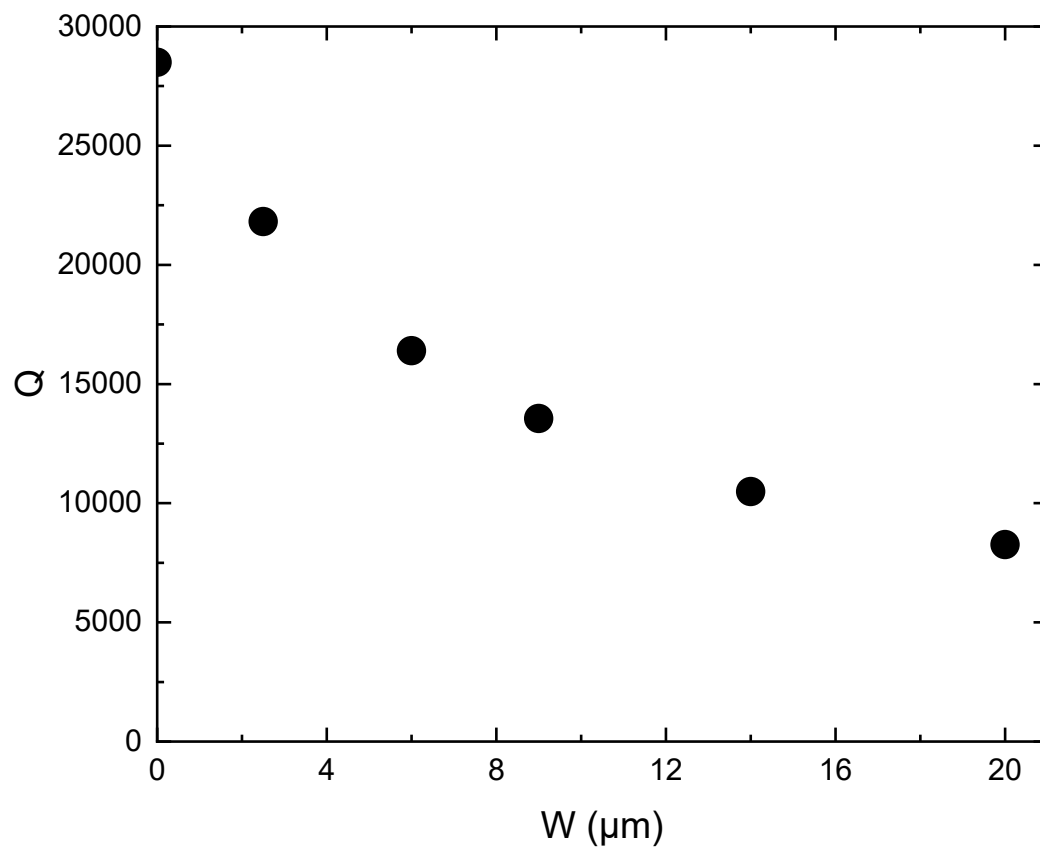

Supplementary Figure 1:  $Q$ , extracted from transmission spectra in Fig.1b, as function of  $W$ .

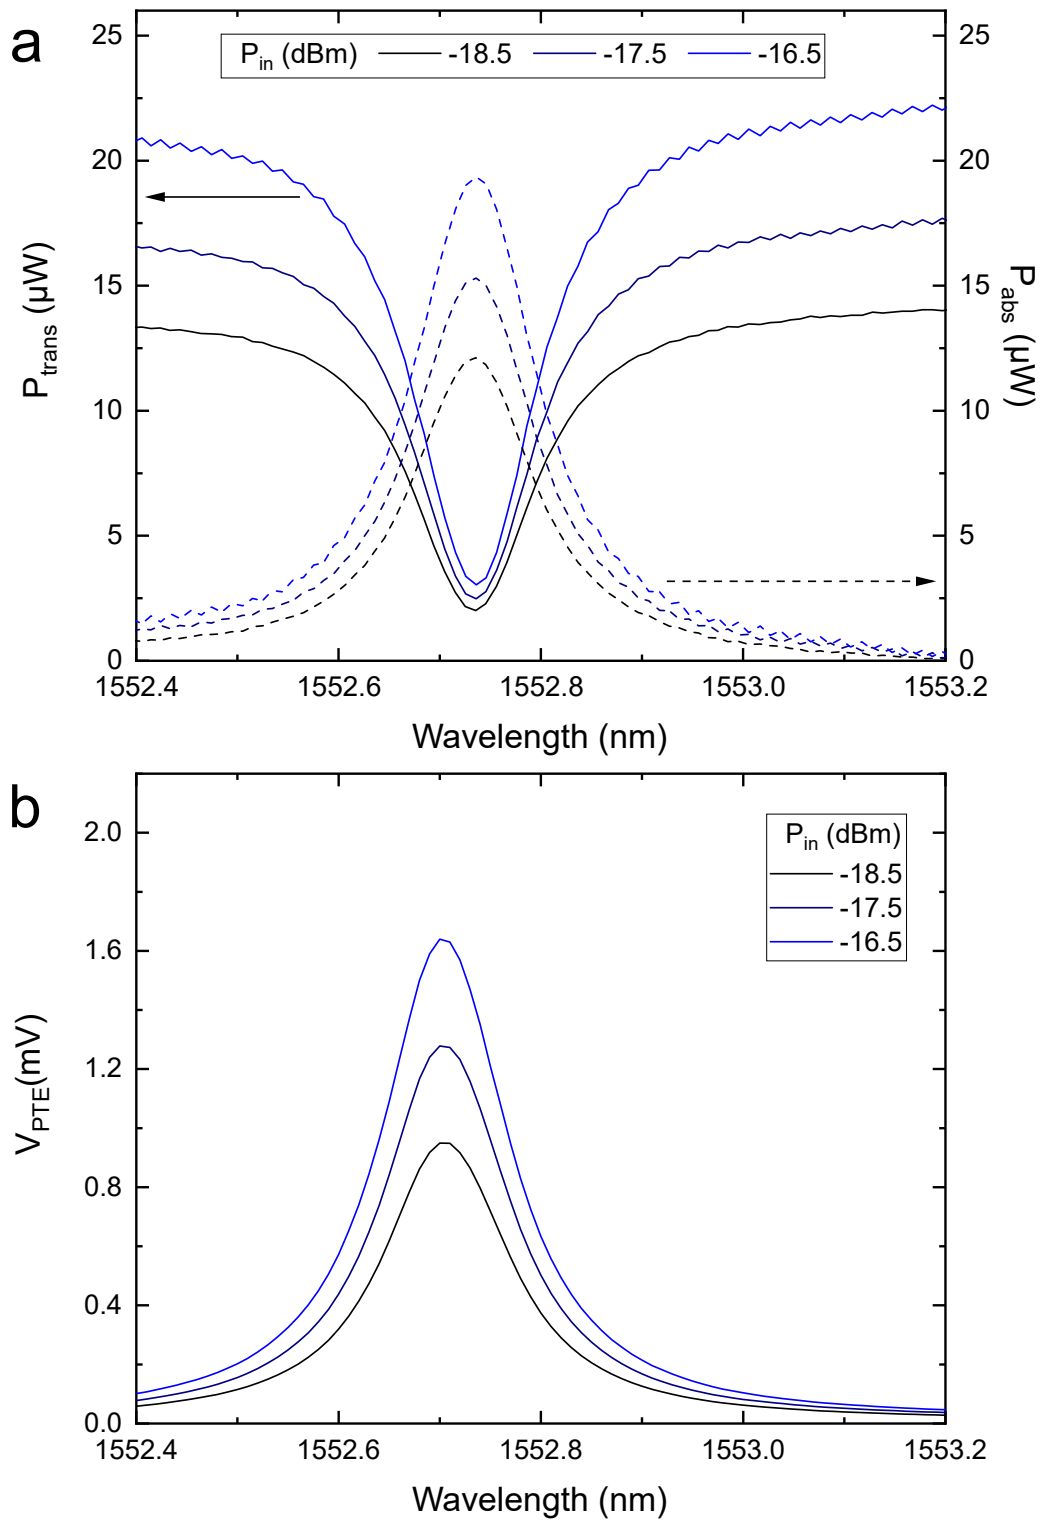

Supplementary Figure 2: (a) Transmitted (solid) and absorbed (dashed) power for three different  $P_{\text{in}}$ . (b) Corresponding photovoltage.

## Supplementary Table

|                       |     |     |     |     |     |     |
|-----------------------|-----|-----|-----|-----|-----|-----|
| $W$ ( $\mu\text{m}$ ) | 0   | 2.5 | 6   | 9   | 14  | 20  |
| $Q$ ( $\times 10^4$ ) | 2.8 | 2.2 | 1.6 | 1.4 | 1.0 | 0.8 |

Supplementary Table 1:  $Q$  for SLG-loaded MRR (cover length  $W$ ).

### Supplementary Note 1: $Q$ from transmission spectra as a function of $W$

Supplementary Table 1 and Supplementary Fig.1 show  $Q$  extracted via[1]:

$$Q = \frac{\lambda_{\text{res}}}{\lambda_{\text{FWHM}}} \quad (1)$$

from Lorentzian fits of the transmission curves plotted in Fig.1b of the main text. The results confirm that the unloaded ( $W=0\mu\text{m}$ ) MRR exhibits the highest  $Q$ , which decreases as  $W$  increases. E.g., for the maximum SLG loading in Fig.1b and Supplementary Fig.1 ( $W=20\mu\text{m}$ ),  $Q$  is reduced  $\sim 71\%$  with respect to the maximum value. This degradation of  $Q$  gives a trade-off with the increase in absorption: as long as the MRR is under-coupled, absorption increases with  $W$  while  $Q$  decreases. Once critical coupling is achieved, and  $W$  is increased further, both  $Q$  and absorption decrease, as shown in Fig.1c and Supplementary Fig.1.

### Supplementary Note 2: power absorbed in the GPDs

Supplementary Fig.2 shows a subset of the transmitted power ( $P_{\text{trans}}$ ) and photovoltage ( $V_{\text{PTE}}$ ) data of Fig.5a,b of the main text. Supplementary Fig.2a provides an estimation of the power absorbed in our GPD, extracted via the simplified expression  $P_{\text{abs}} = P_{\text{in}} - P_{\text{trans}}$  [2]. The subset is restricted to three traces from the linear regime ( $P_{\text{in}} < 0.1\text{mW}$ ) and plotted in linear scale, both chosen to allow a direct visual comparison between Supplementary Fig.2a and b. Supplementary Fig.2 shows the consistent proportionality between  $P_{\text{abs}}$  and  $V_{\text{PTE}}$  in our GPDs. The proportionality factor is given by the internal responsivity, defined as  $R_{\text{int}} = V_{\text{PTE}}/P_{\text{abs}}$ [3].

## Supplementary References

- [1] W. Bogaerts, P. De Heyn, T. Van Vaerenbergh, K. De Vos, S. Kumar Selvaraja, T. Claes, P. Dumon, P. Bienstman, D. Van Thourhout, and R. Baets, *Laser & Photonics Reviews* **6**, 47 (2012).
- [2] D. G. Rabus, *Integrated ring resonators* (Springer, Berlin, 2007).
- [3] F. H. L. Koppens, T. Mueller, P. Avouris, A. C. Ferrari, M. S. Vitiello, and M. Polini, *Nat. Nanotechnol.* **9**, 780 (2014).
